# Supplementary material for: Fluid challenges in intensive care: the FENICE study
Source: Springer Nature journal article supplement (doi:10.1007/s00134-015-3850-x), 2015-07-10
Supplement: MOESM1 [file 8124266]

# Fluid challenges in Intensive Care (FENICE Trial)

## Case Record Form

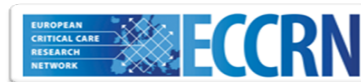

1. Centre number:  2. Patient number:

3. Fluid challenge: hour (24:00) & date  :    2 0 1 3

4. ICU admission: hour (24:00) & date  :    2 0 1 3

5. Age: year

6. Gender:  M  F

7. Height: cm

8. Weight: kg

### 9. Principal diagnosis:

Sepsis  Cardiac  Respiratory  Trauma  Neurologic  Intoxication

Other; please specify:

### 10. Surgical/Medical:

Medical  Scheduled surgical  Emergency surgical

### 11. Shock:

No  Septic  Cardiogenic  Hypovolemic  Anaphylactic  Other

### 12. SOFA score at inclusion:

|                  |                            |                            |                            |                            |                            |
|------------------|----------------------------|----------------------------|----------------------------|----------------------------|----------------------------|
| SOFA CV          | <input type="checkbox"/> 0 | <input type="checkbox"/> 1 | <input type="checkbox"/> 2 | <input type="checkbox"/> 3 | <input type="checkbox"/> 4 |
| SOFA Respiration | <input type="checkbox"/> 0 | <input type="checkbox"/> 1 | <input type="checkbox"/> 2 | <input type="checkbox"/> 3 | <input type="checkbox"/> 4 |
| SOFA Coagulation | <input type="checkbox"/> 0 | <input type="checkbox"/> 1 | <input type="checkbox"/> 2 | <input type="checkbox"/> 3 | <input type="checkbox"/> 4 |
| SOFA Liver       | <input type="checkbox"/> 0 | <input type="checkbox"/> 1 | <input type="checkbox"/> 2 | <input type="checkbox"/> 3 | <input type="checkbox"/> 4 |
| SOFA Neurology   | <input type="checkbox"/> 0 | <input type="checkbox"/> 1 | <input type="checkbox"/> 2 | <input type="checkbox"/> 3 | <input type="checkbox"/> 4 |
| SOFA Urinary     | <input type="checkbox"/> 0 | <input type="checkbox"/> 1 | <input type="checkbox"/> 2 | <input type="checkbox"/> 3 | <input type="checkbox"/> 4 |

### 13. ICU Outcome:

ICU Discharge  ICU death

### 14. Mechanical ventilation:

Yes  No; if yes: fully sedated:  Yes  No ; Spontaneous resp. movements:  Yes  No

Please indicate mode:

|                  |                     | BASELINE                                                                            | END OF FLUIDS                                                                       |
|------------------|---------------------|-------------------------------------------------------------------------------------|-------------------------------------------------------------------------------------|
| FiO2             | %                   | <input type="text"/> <input type="text"/> <input type="text"/>                      | <input type="text"/> <input type="text"/> <input type="text"/>                      |
| Respiratory rate | R/min               | <input type="text"/> <input type="text"/>                                           | <input type="text"/> <input type="text"/>                                           |
| Tidal volume     | ml                  | <input type="text"/> <input type="text"/> <input type="text"/> <input type="text"/> | <input type="text"/> <input type="text"/> <input type="text"/> <input type="text"/> |
| Plateau pressure | cm H <sub>2</sub> O | <input type="text"/> <input type="text"/>                                           | <input type="text"/> <input type="text"/>                                           |
| PEEP             | cm H <sub>2</sub> O | <input type="text"/> <input type="text"/>                                           | <input type="text"/> <input type="text"/>                                           |

FENICE patient ID

**15. Renal support:**

No  HD  CVVH

**16. Fluid balance (previous 24h):** Input /   .  Output /   .  Balance /   .

**17. Lab:**

Creatinine  mg/dl or  umol/l     .  Sodium mEq/l

Potassium mEq/l   .  Chloride mEq/l

**18. What was the main indication for fluid administration?**

Hypotension  Weaning vasopressor  Cardiac output  Oliguria  Skin mottling  
 Hyperlactatemia  ScvO<sub>2</sub>  SVV/PPV  CVP/PAOP  
 Other; please specify:

**19. Hemodynamic variable considered to predict a positive response to a fluid challenge:**

Indicate the one used clinically in this fluid challenge

No variable used  PAOP mmHg    CVP mmHg

SVV %     PPV %     GEDVI ml/m<sup>2</sup>

Passive leg raising (PLR):  Arterial pressure increase during PLR %

CO / SV increase during PLR %

Other test; please specify:

**20. Type of fluid**

NaCl 0.9%  RL Hartmann  Plasmalyte  Starch  Albumin 4-5%  Gelatine  Dextrane  
 Other; please specify:

**21. Amount fluids given as fluid challenge:** ml

**22. Rate of fluid administration:**  ml/min or  ml/h

**23. Specific comments of the investigators:**

**24. Evolution of variables during fluid challenge:**

|                             |                   | BASELINE | END OF FLUIDS |
|-----------------------------|-------------------|----------|---------------|
| Time elapsed                | min               | Time 0   |               |
| Temperature                 | °C                |          |               |
| Heart rate                  | bpm               |          |               |
| Arterial pressure systolic  | mmHg              |          |               |
| Arterial pressure diastolic | mmHg              |          |               |
| Arterial pressure mean      | mmHg              |          |               |
| PAP systolic                | mmHg              |          |               |
| PAP diastolic               | mmHg              |          |               |
| PAP mean                    | mmHg              |          |               |
| PAOP                        | mmHg              |          |               |
| CVP                         | mmHg              |          |               |
| CO                          | L/min             |          |               |
| SV                          | ml                |          |               |
| SVV                         | %                 |          |               |
| PPV                         | %                 |          |               |
| GEDVI                       | ml/m <sup>2</sup> |          |               |
| EVLWI                       | ml/kg             |          |               |
| Urine output                | ml/h              |          |               |

**25. Blood gas analysis during fluid challenge:**

|                   |                               |                               |                                 |  |  |
|-------------------|-------------------------------|-------------------------------|---------------------------------|--|--|
| Hemoglobin        | <input type="checkbox"/> g/dl | <input type="checkbox"/> g/l  | <input type="checkbox"/> mmol/l |  |  |
| pH arterial       |                               |                               |                                 |  |  |
| paCO <sub>2</sub> | <input type="checkbox"/> kPa  | <input type="checkbox"/> mmHg |                                 |  |  |
| PaO <sub>2</sub>  |                               | mmHg                          |                                 |  |  |
| SaO <sub>2</sub>  |                               | %                             |                                 |  |  |
| ScvO <sub>2</sub> |                               | %                             |                                 |  |  |
| SvO <sub>2</sub>  |                               | %                             |                                 |  |  |
| Lactate           |                               | mmol/l                        |                                 |  |  |

**26. Vasoactive drugs during fluid challenge:**

|                |            | BASELINE                                    | END OF FLUIDS                               |
|----------------|------------|---------------------------------------------|---------------------------------------------|
| Dopamine       | mcg/kg/min | <input type="text"/>                        | <input type="text"/>                        |
| Norepinephrine | mcg/kg/min | <input type="text"/> . <input type="text"/> | <input type="text"/> . <input type="text"/> |
| Epinephrine    | mcg/kg/min | <input type="text"/> . <input type="text"/> | <input type="text"/> . <input type="text"/> |
| Vasopressin    | U/min      | <input type="text"/> . <input type="text"/> | <input type="text"/> . <input type="text"/> |
| Dobutamine     | mcg/kg/min | <input type="text"/>                        | <input type="text"/>                        |
| Milrinone      | mcg/kg/min | <input type="text"/> . <input type="text"/> | <input type="text"/> . <input type="text"/> |
| Other          | .....      | <input type="text"/>                        | <input type="text"/>                        |

**27. Response to fluids:**

- No response  Positive response  Do not know / uncertain

**28. Positive response to fluids based on:**

- |                                                      |                                                   |                                                      |
|------------------------------------------------------|---------------------------------------------------|------------------------------------------------------|
| <input type="checkbox"/> Change in arterial pressure | <input type="checkbox"/> Change in cardiac output | <input type="checkbox"/> Change in stroke volume     |
| <input type="checkbox"/> Change in heart rate        | <input type="checkbox"/> Change in urine output   | <input type="checkbox"/> Change in lactate level     |
| <input type="checkbox"/> Change in skin perfusion    | <input type="checkbox"/> Change mental state      | <input type="checkbox"/> Change in ScvO <sub>2</sub> |
| <input type="checkbox"/> Change in CVP/PAOP          | <input type="checkbox"/> Change in SVV/PPV        |                                                      |

Other; please specify:

**29. Did you consider further fluids?**

- No  Yes

**30. Was a variable used as safety limit?**

- |                                                          |                                                         |                                                                                    |
|----------------------------------------------------------|---------------------------------------------------------|------------------------------------------------------------------------------------|
| <input type="checkbox"/> No variable used                | <input type="checkbox"/> PAOP mmHg <input type="text"/> | <input type="checkbox"/> CVP mmHg <input type="text"/>                             |
| <input type="checkbox"/> SVV % <input type="text"/>      | <input type="checkbox"/> PPV % <input type="text"/>     | <input type="checkbox"/> GEDVI ml/m <sup>2</sup> <input type="text"/>              |
| <input type="checkbox"/> EVLW ml/kg <input type="text"/> | <input type="checkbox"/> CO L/min <input type="text"/>  | <input type="checkbox"/> SpO <sub>2</sub> /SaO <sub>2</sub> % <input type="text"/> |

Other; please specify:

**31. Was the fluid challenge stopped for safety reasons?**

- No  Yes: Stopped due to:  Low arterial pressure  High arterial pressure  Low CO  High CO  
 Pulmonary edema  High CVP/PAOP  Futility

**32. If you have not used one of the following variables, please specify reasons**

- |              |                                        |                                         |                                                       |                                                    |
|--------------|----------------------------------------|-----------------------------------------|-------------------------------------------------------|----------------------------------------------------|
| <b>CVP</b>   | <input type="checkbox"/> Not available | <input type="checkbox"/> Not applicable | <input type="checkbox"/> Other variable more relevant | <input type="checkbox"/> No trust in this variable |
| <b>PAOP</b>  | <input type="checkbox"/> Not available | <input type="checkbox"/> Not applicable | <input type="checkbox"/> Other variable more relevant | <input type="checkbox"/> No trust in this variable |
| <b>GEDVI</b> | <input type="checkbox"/> Not available | <input type="checkbox"/> Not applicable | <input type="checkbox"/> Other variable more relevant | <input type="checkbox"/> No trust in this variable |
| <b>SVV</b>   | <input type="checkbox"/> Not available | <input type="checkbox"/> Not applicable | <input type="checkbox"/> Other variable more relevant | <input type="checkbox"/> No trust in this variable |
| <b>PPV</b>   | <input type="checkbox"/> Not available | <input type="checkbox"/> Not applicable | <input type="checkbox"/> Other variable more relevant | <input type="checkbox"/> No trust in this variable |
| <b>PLR</b>   | <input type="checkbox"/> Not available | <input type="checkbox"/> Not applicable | <input type="checkbox"/> Other variable more relevant | <input type="checkbox"/> No trust in this test     |

PLR = Passive leg raising
